# Supplementary material for: MiR-194 Deregulation Contributes To Colorectal Carcinogenesis via Targeting AKT2 Pathway
Source: PubMed Central journal article supplement — Theranostics. 2014 Sep 19;4(12):1193–208. doi: 10.7150/thno.8712 (PMC4183997; doi:10.7150/thno.8712), 2014-09-19

**Supplementary Table 1. Hematoxylin-eosin staining of lungs to evaluate the presence of lung metastasis in nude mice**

|               | <b>With lung metastasis</b> | <b>Without lung metastasis</b> |
|---------------|-----------------------------|--------------------------------|
| PBS           | 8                           | 2                              |
| Control miRNA | 9                           | 1                              |
| miR-194       | 3                           | 7                              |

Statistical Method: Chi-square test and Fisher's Exact test; PBS vs control miRNA, *P* value=0.99, control miRNA vs miR-194, *P* value=0.0198.

**Supplementary Fig. 1 (A)** Real-time PCR quantification of miR-194 in HCT116 cell after transfected with miR-194 mimics or control miRNA and the empty control. **(B)** Propidium iodide (PI) and flow cytometry confirmed cell cycle in HCT116 and SW1116 cells. Respectively, G0/G1 phase arrest and S phase arrest were detected. **(C)** Annexin V-staining and flow cytometry analyzed apoptosis in HCT116 and SW1116 cells. Western blot revealed that miR-194 enhanced expression of cleaved caspase3 in HCT116.  $\beta$ -actin was used as the loading control.

**Supplementary Fig. 2 (A)** Schematic illustration of the predicted miR-194-binding sites in IGF1R, Fizzled-4, DNMT3A and AKT2 3'-UTR. **(B)** mRNA levels of IGF1R, Fizzled-4 and DNMT3A after miR-194 mimics transfection in HCT116 and SW1116 cells. **(C)** Real time PCR examined the expression of miR-194 in xenograft tumors of three groups. All values were normalized to U6 expression. All experiments were repeated at least three separate times; Data are shown as mean  $\pm$  SD,

**Supplementary Fig. 3 (A)** The expression level of miR-194 in response to TSA treatment in CRC cells. **(B)** The expressions level of miR-194 and EZH2 after transfection of EZH2 siRNA and control siRNA in CRC and **(C)** gastric cancer

Supplementary Fig. 1

A

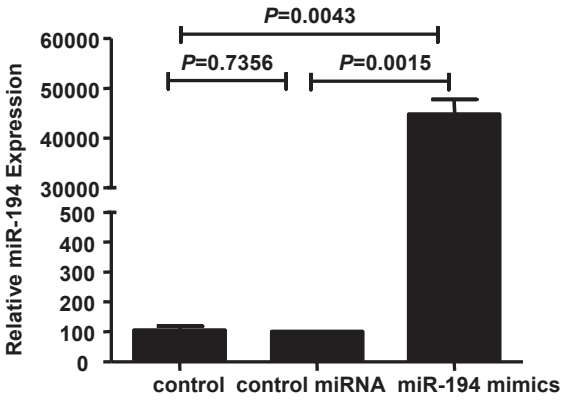

B

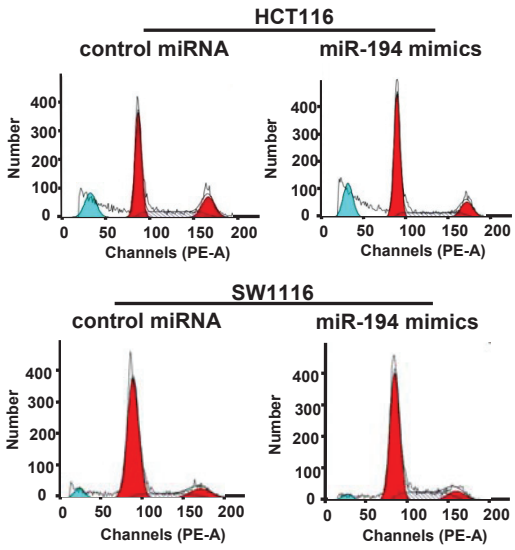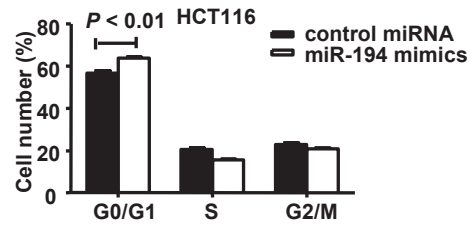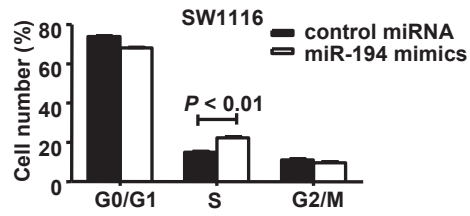

C

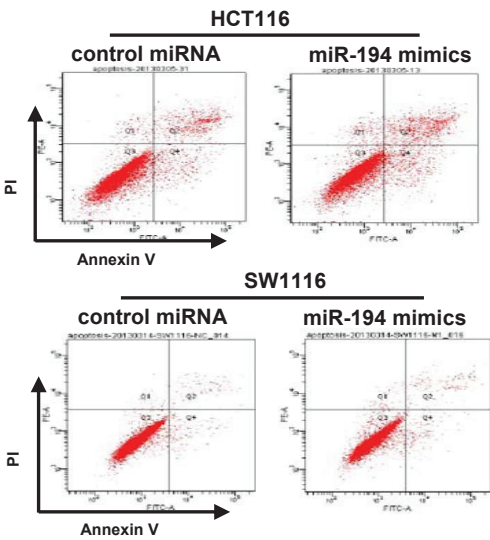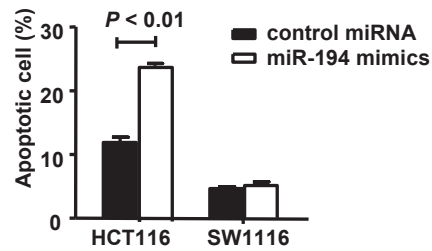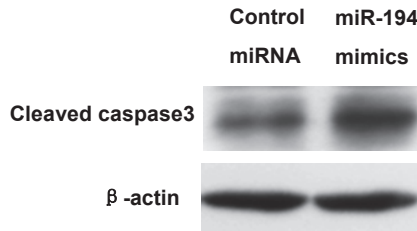

# Supplementary Fig. 2

A

miR-194 3' AGGUGU**ACCUC**AAC **GACAAUGU**  
 IGF1R 5' ...UCACAGCAU**UGGAGC**--**CUGUUACA**...  
 NM\_000875

miR-194 3' AGGUGU**ACCUC**AAC **GACAAUGU**  
 DNMT3A 5' ...AGUUUCUAGAAGCCGC**UGUUACC**...

miR-194 3' AGGUGU**ACCUC**AAC**GACAAUGU**  
 Frizzled-4 5' ...CUGGGUUCAGAAAAG**UGUUACA**...

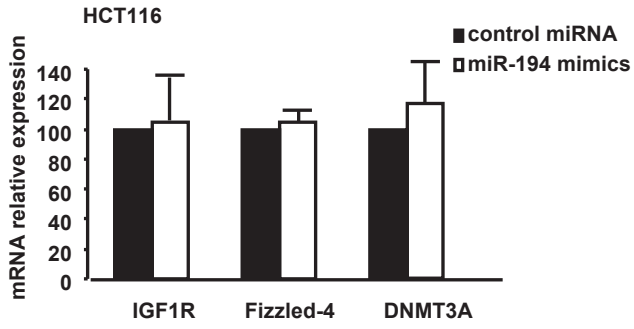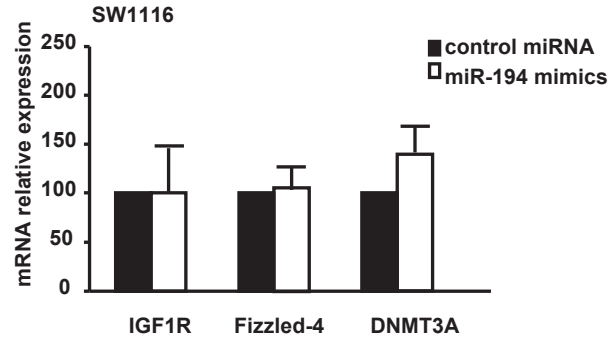

B

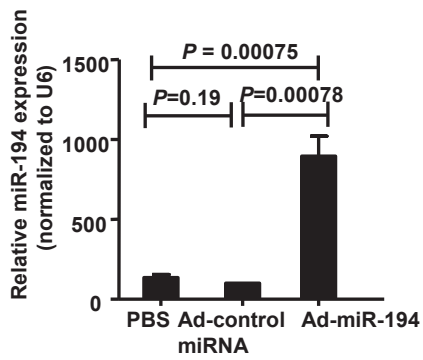

Supplementary Fig. 3

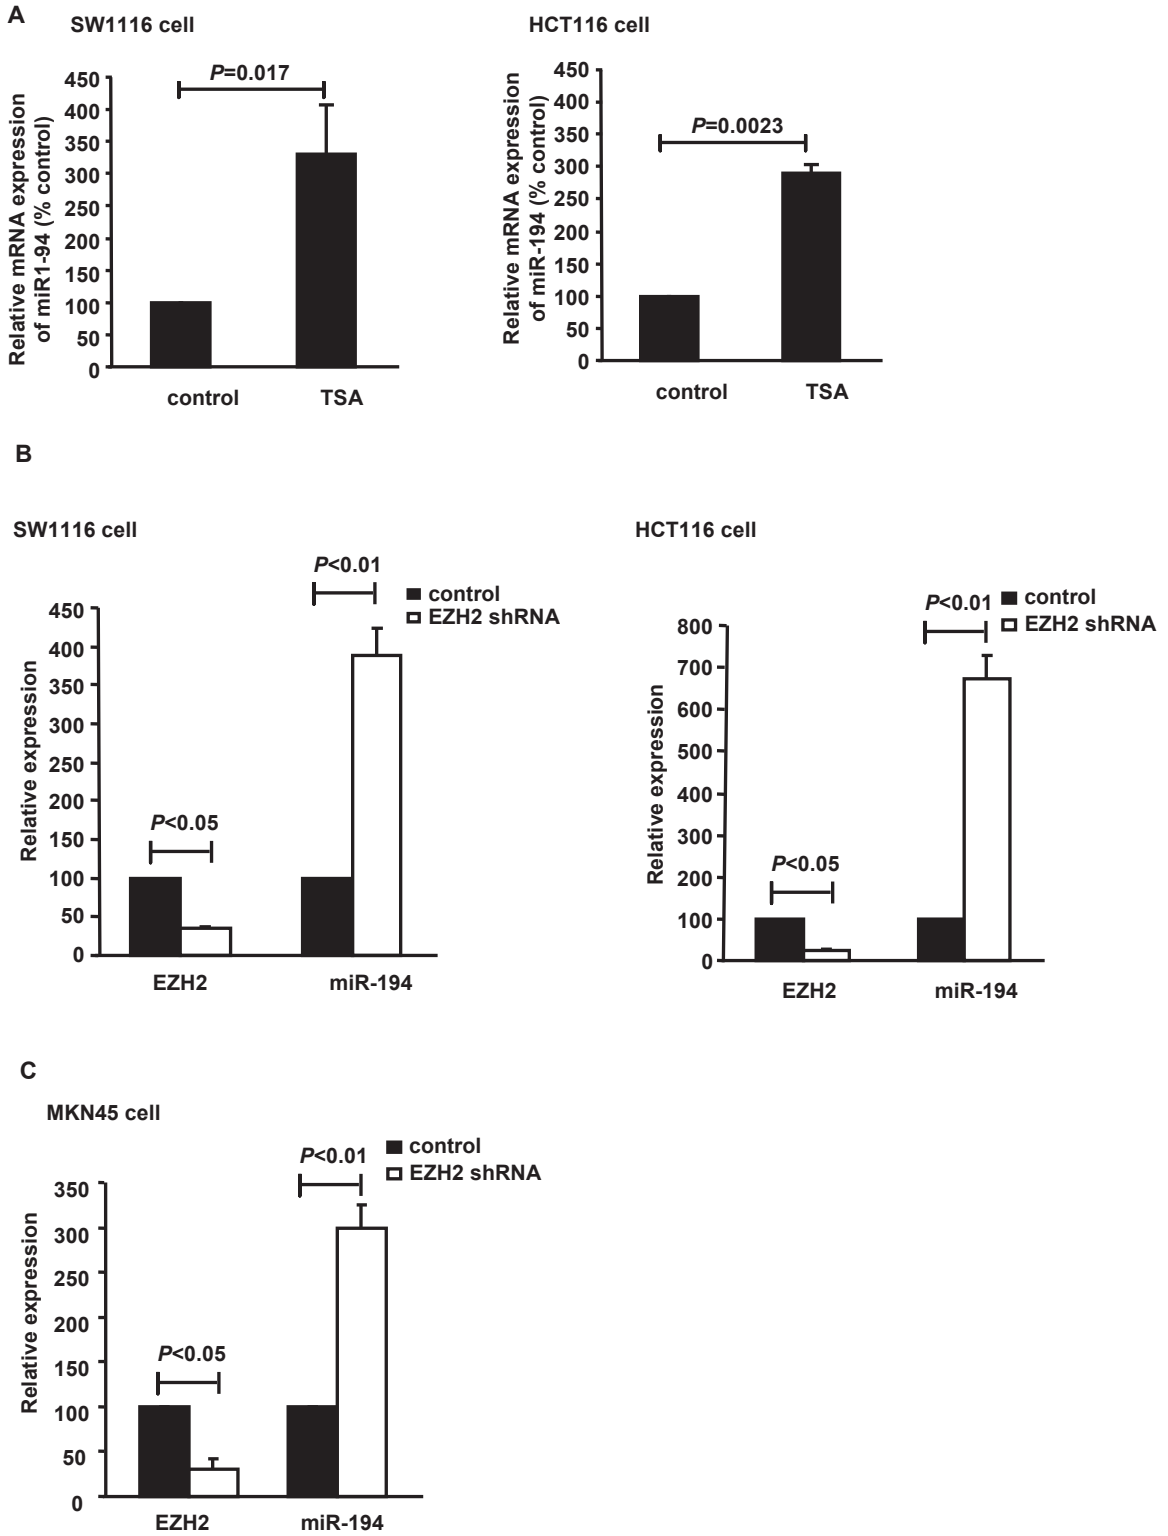

Supplement: thnov04p1193s1.pdf [file thnov04p1193s1.pdf]
